# Supplementary material for: Platelet-rich plasma therapy for chronic cutaneous wounds stratified by etiology: a systematic review of randomized clinical trials
Source: Springer Nature journal article supplement (doi:10.1007/s40267-023-01044-7), 2024-01-01
Supplement: MOESM1 [file 26796170]

## **Platelet-rich Plasma Therapy for Chronic Cutaneous Wounds Stratified by Etiology: A Systematic Review of Randomized Clinical Trials**

Verónica Salgado-Pacheco<sup>1,2,3</sup>

Montserrat Serra-Mas<sup>1,4,\*</sup>

Marta Otero-Viñas<sup>1,2,\*</sup>

<sup>1</sup> Tissue Repair and Regeneration Laboratory (TR2Lab), Institut de Recerca i Innovació en Ciències de la Vida i de la Salut a la Catalunya Central (IrisCC), Ctra. de Roda, 70 08500 Vic, Barcelona, Spain

<sup>2</sup> Department of Biosciences, Faculty of Science, Technology and Engineering, University of Vic – Central University of Catalonia (UVic-UCC), C. de la Laura, 13, 08500 Vic, Barcelona, Spain

<sup>3</sup> Medicine and Biomedical Sciences, Doctoral School, University of Vic - Central University of Catalonia (UVic-UCC), C. Dr. Junyent, 1 08500 Vic, Vic, Spain

<sup>4</sup> Department of Experimental and Methodological Sciences. Faculty of Health Sciences and Welfare, University of Vic - Central University of Catalonia (UVic-UCC), C. Sagrada Família, 7, 08500 Vic, Spain.

### **\* Corresponding authors:**

Marta Otero-Viñas

Email: [marta.otero@uvic.cat](mailto:marta.otero@uvic.cat)

Montserrat Serra-Mas

Email: [montserrat.serra@uvic.cat](mailto:montserrat.serra@uvic.cat)

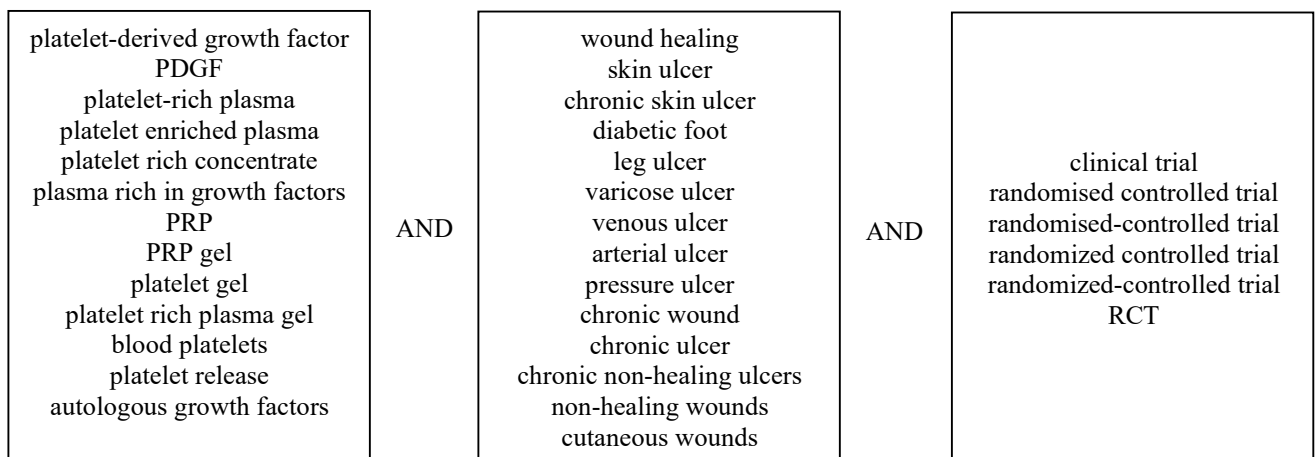

**Fig. S1** Search strategy

**Table S1.** Excluded studies

| Study                  | Exclusion criteria                                                |
|------------------------|-------------------------------------------------------------------|
| Amato et al., 2019     | Etiology not described                                            |
| Anitua et al., 2008    | Sample size < 20 patients, dropout rate >15%                      |
| Bogdan et al., 2014    | Not in English                                                    |
| Cervelli et al. 2011   | Study design (not RCT), post-traumatic wounds, not autologous PRP |
| Driver et al., 2006    | Dropout rate >15%                                                 |
| Escamilla et al., 2016 | Study design*                                                     |
| Ficarelli et al., 2008 | Study design (not RCT)                                            |
| Ganio et al., 1993     | Study design (not RCT)                                            |
| Gude et al., 2019      | Non-standard procedure for PRP                                    |
| Habeeb et al., 2020    | Not autologous PRP, traumatic post-surgery wounds                 |
| Holloway et al., 1993  | Not autologous PRP (single apheresis from donors)                 |
| Kastelan et al., 1998  | Study design (not RCT), not autologous PRP                        |
| Khorvash et al., 2017  | Not in English                                                    |
| Knighton et al., 1990  | Not autologous PRP                                                |
| Liu et al., 2016       | Not in English                                                    |

|                         |                                                                       |
|-------------------------|-----------------------------------------------------------------------|
| Mohammad et al., 2017   | Not in English                                                        |
| Obolenskiy et al., 2014 | Etiology not described (mixed wounds)                                 |
| Rainys et al., 2019     | Etiology not described                                                |
| Samuel et al., 2016     | Not autologous PRP                                                    |
| Santoro et al., 2018    | Not an article (oral presentation in a meeting)                       |
| Singh et al., 2014      | Study design (not RCT)                                                |
| Sriram et al., 2014     | Not an article (abstract)                                             |
| Sylvaine et al., 2020   | Not an article (abstract)                                             |
| Tsachiridi et al., 2019 | Dropout rate >15%                                                     |
| Tsai et al., 2019       | Etiology not described (comparing diabetic and non-diabetic patients) |
| Weed et al., 2004       | Etiology not described                                                |

\* The study analyzes ulcers instead of patients.

RCT, Randomized-controlled trial.

PRP, Platelet-rich plasma.

**Table S2.** PRP application protocol

| Study                   | Etiology | Application mode        | Application interval                      |
|-------------------------|----------|-------------------------|-------------------------------------------|
| Ahmed et al., 2017      | Diabetic | Platelet gel            | Twice weekly                              |
| Elsaid et al., 2019     | Diabetic | PRP gel                 | Twice weekly                              |
| Gupta et al., 2021      | Diabetic | PRP injection           | Weekly                                    |
| He et al., 2020         | Diabetic | Topical administration  | Once, repeated after 2 weeks if necessary |
| Kakagia et al., 2007    | Diabetic |                         | ND                                        |
| Karimi et al., 2016     | Diabetic | PRP dressing            | Only once at the beginning                |
| Li et al., 2015         | Diabetic | Topical APG application | Once, repeated after 2 weeks if necessary |
| Malekpour et al., 2021  | Diabetic | PRP gel                 | Twice weekly                              |
| Saad Setta et al., 2011 | Diabetic | PRP application         | Twice weekly                              |

|                          |          |                                           |                                    |
|--------------------------|----------|-------------------------------------------|------------------------------------|
| Elbarbary et al., 2020   | Venous   | PRP in dressing or injection in edges     | Every two weeks                    |
| Elgarhy et al., 2020     | Venous   | ND                                        | Weekly                             |
| Helmy et al., 2021       | Venous   | Intradermal or subdermal injection of PRP | Weekly                             |
| Moneib et al., 2018      | Venous   | Topical PRP gel                           | ND                                 |
| Stacey et al., 2000      | Venous   | Platelet lysate                           | Twice weekly                       |
| Chandanwale et al., 2020 | Arterial | Local infiltration                        | Repeated every 4 <sup>th</sup> day |
| Uçar et al., 2020        | Pressure | Topical PRP gel                           | Every 3 days                       |

PRP, Platelet-rich plasma.  
 ND, Not described.

**Table S3.** Diabetic ulcers data

| Study                   | Etiology | Arteries affected | Glycemic control | DM duration    | Osteomyelitis |
|-------------------------|----------|-------------------|------------------|----------------|---------------|
| Ahmed et al., 2017      | Diabetic | Included          | Yes              | ND             | Excluded      |
| Elsaid et al., 2019     | Diabetic | Excluded          | Yes              | Not controlled | Excluded      |
| Gupta et al., 2021      | Diabetic | ND                | ND               | Yes            | Excluded      |
| He et al., 2020         | Diabetic | Included          | Yes              | Yes            | ND            |
| Kakagia et al., 2007    | Diabetic | Excluded          | Yes              | ND             | Excluded      |
| Karimi et al., 2016     | Diabetic | Excluded          | Yes              | Yes            | Excluded      |
| Li et al., 2015         | Diabetic | Included          | Yes              | Yes            | ND            |
| Malekpour et al., 2021  | Diabetic | Excluded          | Yes              | ND             | Excluded      |
| Saad Setta et al., 2011 | Diabetic | ND                | ND               | ND             | ND            |

DM, Diabetes Mellitus.  
 ND, Not described.

**Table S4.** Initial wound area

| Study                      | Etiology | Initial wound area                    |                                      |
|----------------------------|----------|---------------------------------------|--------------------------------------|
|                            |          | Control group                         | PRP group                            |
| Ahmed et al., 2017         | Diabetic | (2.2 ± 1.2) x (2.6 ± 0.4) cm          | (2.6 ± 0.7) x (2.4 ± 1.1) cm         |
| Elsaid et al., 2019        | Diabetic | MLD: 4 ± 1.5 cm<br>MHD: 3.79 ± 1.4 cm | MLD: 4.3 ± 2 cm<br>MHD: 4.6 ± 2.7 cm |
| Gupta et al., 2021         | Diabetic | 4.96 ± 2.89 cm <sup>2</sup>           | 5.22 ± 3.82 cm <sup>2</sup>          |
| He et al., 2020            | Diabetic | 9.73 ± 9.72 cm <sup>2</sup>           | 8.43 ± 6.93 cm <sup>2</sup>          |
| Kakagia et al., 2007       | Diabetic | 25.8 ± 15.2 cm <sup>2</sup>           | 28.4 ± 13.6 cm <sup>2</sup>          |
| Karimi et al., 2016 *      | Diabetic | 13.22 ± 9.35 mm <sup>2</sup>          | 6.98 ± 9.82 mm <sup>2</sup>          |
| Li et al., 2015            | Diabetic | 2.9 (1.0-10.5) cm <sup>2</sup>        | 4.1 (1.4-11.4) cm <sup>2</sup>       |
| Malekpour et al., 2021     | Diabetic |                                       | ND                                   |
| Saad Setta et al., 2011    | Diabetic | 8.50 (4-20) cm <sup>2</sup>           | 10.25 (5-21) cm <sup>2</sup>         |
| Elbarbary et al., 2020     | Venous   | 17.8 ± 5.4 cm <sup>2</sup>            | 16.5 ± 8.2 cm <sup>2</sup>           |
| Elgarhy et al., 2020       | Venous   | 15.0 ± 8.30 cm <sup>2</sup>           | 33.70 ± 53.32 cm <sup>2</sup>        |
| Helmy et al., 2021         | Venous   | 20.4 ± 18 cm <sup>2</sup>             | 16.7 ± 11 cm <sup>2</sup>            |
| Moneib et al., 2018        | Venous   | 2.94 ± 1.22 cm <sup>2</sup>           | 7.97 ± 16.88 cm <sup>2</sup>         |
| Stacey et al., 2000        | Venous   | 4.79 ± 8.24 cm <sup>2</sup>           | 5.06 ± 8.7 cm <sup>2</sup>           |
| Chandanwale et al., 2020 * | Arterial | 2262.5 mm <sup>2</sup>                | 2298.8 mm <sup>2</sup>               |
| Uçar et al., 2020          | Pressure | 4.83 ± 1.34 cm <sup>2</sup>           | 4.70 ± 1.78 cm <sup>2</sup>          |

The table includes the original data provided by the studies.

\* The data is represented using various units of measurement according to the original data of the articles.

PRP, Platelet-rich plasma.

MLD, Maximum longitudinal diameter.

MHD, Maximum horizontal diameter.

ND, Not described.
